# Supplementary material for: Structure of a functional cap-binding domain in Rift Valley fever virus L protein
Source: PubMed Central journal article supplement (PMC6555543; doi:10.1371/journal.ppat.1007829), 2019-05-28
Supplement: ppat.1007829.s002.pdf [file ppat.1007829.s002.pdf]

**S2 Table. List of interactions of RVFV CBD chain A with m<sup>7</sup>GTP generated by PDBsum.**

**Hydrogen bonds**

|   | <---- | ATOM 1 |      |      |       | -----> |      | <--- | ATOM 2 |      |       |          | -----> |  |
|---|-------|--------|------|------|-------|--------|------|------|--------|------|-------|----------|--------|--|
|   | Atom  | Atom   | Res  | Res  |       |        | Atom | Atom | Res    | Res  |       |          |        |  |
|   | no.   | name   | name | no.  | Chain |        | no.  | name | name   | no.  | Chain | Distance |        |  |
| 1 | 84    | NH1    | ARG  | 1716 | A     | -->    | 969  | O2B  | MGT    | 2001 | A     | 2.71     |        |  |
| 2 | 85    | NH2    | ARG  | 1716 | A     | -->    | 965  | O3G  | MGT    | 2001 | A     | 2.98     |        |  |
| 3 | 86    | N      | GLN  | 1717 | A     | -->    | 989  | O6   | MGT    | 2001 | A     | 2.75     |        |  |
| 4 | 93    | OE1    | GLN  | 1717 | A     | <--    | 990  | N1   | MGT    | 2001 | A     | 2.67     |        |  |
| 5 | 93    | OE1    | GLN  | 1717 | A     | <--    | 992  | N2   | MGT    | 2001 | A     | 2.95     |        |  |

**Non-bonded contacts**

|    | <---- | ATOM 1 |      |      |       | -----> |      | <--- | ATOM 2 |      |       |          | -----> |  |
|----|-------|--------|------|------|-------|--------|------|------|--------|------|-------|----------|--------|--|
|    | Atom  | Atom   | Res  | Res  |       |        | Atom | Atom | Res    | Res  |       |          |        |  |
|    | no.   | name   | name | no.  | Chain |        | no.  | name | name   | no.  | Chain | Distance |        |  |
| 1  | 54    | CD2    | PHE  | 1713 | A     | ---    | 985  | N7   | MGT    | 2001 | A     | 3.83     |        |  |
| 2  | 54    | CD2    | PHE  | 1713 | A     | ---    | 987  | C5   | MGT    | 2001 | A     | 3.78     |        |  |
| 3  | 56    | CE2    | PHE  | 1713 | A     | ---    | 987  | C5   | MGT    | 2001 | A     | 3.66     |        |  |
| 4  | 56    | CE2    | PHE  | 1713 | A     | ---    | 988  | C6   | MGT    | 2001 | A     | 3.85     |        |  |
| 5  | 56    | CE2    | PHE  | 1713 | A     | ---    | 994  | C4   | MGT    | 2001 | A     | 3.8      |        |  |
| 6  | 57    | CZ     | PHE  | 1713 | A     | ---    | 988  | C6   | MGT    | 2001 | A     | 3.89     |        |  |
| 7  | 57    | CZ     | PHE  | 1713 | A     | ---    | 990  | N1   | MGT    | 2001 | A     | 3.81     |        |  |
| 8  | 76    | CA     | ARG  | 1716 | A     | ---    | 989  | O6   | MGT    | 2001 | A     | 3.67     |        |  |
| 9  | 77    | C      | ARG  | 1716 | A     | ---    | 989  | O6   | MGT    | 2001 | A     | 3.67     |        |  |
| 10 | 79    | CB     | ARG  | 1716 | A     | ---    | 986  | CM7  | MGT    | 2001 | A     | 3.8      |        |  |
| 11 | 80    | CG     | ARG  | 1716 | A     | ---    | 986  | CM7  | MGT    | 2001 | A     | 3.76     |        |  |
| 12 | 83    | CZ     | ARG  | 1716 | A     | ---    | 965  | O3G  | MGT    | 2001 | A     | 3.62     |        |  |
| 13 | 83    | CZ     | ARG  | 1716 | A     | ---    | 969  | O2B  | MGT    | 2001 | A     | 3.66     |        |  |
| 14 | 83    | CZ     | ARG  | 1716 | A     | ---    | 986  | CM7  | MGT    | 2001 | A     | 3.81     |        |  |
| 15 | 84    | NH1    | ARG  | 1716 | A     | ---    | 965  | O3G  | MGT    | 2001 | A     | 3.54     |        |  |
| 16 | 84    | NH1    | ARG  | 1716 | A     | ---    | 967  | PB   | MGT    | 2001 | A     | 3.76     |        |  |
| 17 | 84    | NH1    | ARG  | 1716 | A     | ---    | 968  | O1B  | MGT    | 2001 | A     | 3.67     |        |  |
| 18 | 84    | NH1    | ARG  | 1716 | A     | ---    | 969  | O2B  | MGT    | 2001 | A     | 2.71     |        |  |
| 19 | 85    | NH2    | ARG  | 1716 | A     | ---    | 965  | O3G  | MGT    | 2001 | A     | 2.98     |        |  |
| 20 | 85    | NH2    | ARG  | 1716 | A     | ---    | 968  | O1B  | MGT    | 2001 | A     | 3.42     |        |  |
| 21 | 85    | NH2    | ARG  | 1716 | A     | ---    | 969  | O2B  | MGT    | 2001 | A     | 3.75     |        |  |
| 22 | 86    | N      | GLN  | 1717 | A     | ---    | 989  | O6   | MGT    | 2001 | A     | 2.75     |        |  |
| 23 | 87    | CA     | GLN  | 1717 | A     | ---    | 989  | O6   | MGT    | 2001 | A     | 3.6      |        |  |
| 24 | 90    | CB     | GLN  | 1717 | A     | ---    | 989  | O6   | MGT    | 2001 | A     | 3.36     |        |  |
| 25 | 90    | CB     | GLN  | 1717 | A     | ---    | 990  | N1   | MGT    | 2001 | A     | 3.84     |        |  |
| 26 | 91    | CG     | GLN  | 1717 | A     | ---    | 989  | O6   | MGT    | 2001 | A     | 3.73     |        |  |
| 27 | 91    | CG     | GLN  | 1717 | A     | ---    | 990  | N1   | MGT    | 2001 | A     | 3.74     |        |  |
| 28 | 92    | CD     | GLN  | 1717 | A     | ---    | 990  | N1   | MGT    | 2001 | A     | 3.56     |        |  |
| 29 | 93    | OE1    | GLN  | 1717 | A     | ---    | 988  | C6   | MGT    | 2001 | A     | 3.83     |        |  |
| 30 | 93    | OE1    | GLN  | 1717 | A     | ---    | 990  | N1   | MGT    | 2001 | A     | 2.67     |        |  |
| 31 | 93    | OE1    | GLN  | 1717 | A     | ---    | 991  | C2   | MGT    | 2001 | A     | 3.22     |        |  |
| 32 | 93    | OE1    | GLN  | 1717 | A     | ---    | 992  | N2   | MGT    | 2001 | A     | 2.95     |        |  |
| 33 | 178   | CG     | TYR  | 1728 | A     | ---    | 990  | N1   | MGT    | 2001 | A     | 3.66     |        |  |

|    |     |     |     |      |   |     |     |     |     |      |   |      |
|----|-----|-----|-----|------|---|-----|-----|-----|-----|------|---|------|
| 34 | 178 | CG  | TYR | 1728 | A | --- | 991 | C2  | MGT | 2001 | A | 3.69 |
| 35 | 179 | CD1 | TYR | 1728 | A | --- | 988 | C6  | MGT | 2001 | A | 3.62 |
| 36 | 179 | CD1 | TYR | 1728 | A | --- | 990 | N1  | MGT | 2001 | A | 3.73 |
| 37 | 180 | CD2 | TYR | 1728 | A | --- | 991 | C2  | MGT | 2001 | A | 3.61 |
| 38 | 180 | CD2 | TYR | 1728 | A | --- | 993 | N3  | MGT | 2001 | A | 3.63 |
| 39 | 181 | CE1 | TYR | 1728 | A | --- | 985 | N7  | MGT | 2001 | A | 3.87 |
| 40 | 181 | CE1 | TYR | 1728 | A | --- | 987 | C5  | MGT | 2001 | A | 3.54 |
| 41 | 181 | CE1 | TYR | 1728 | A | --- | 988 | C6  | MGT | 2001 | A | 3.71 |
| 42 | 181 | CE1 | TYR | 1728 | A | --- | 994 | C4  | MGT | 2001 | A | 3.88 |
| 43 | 182 | CE2 | TYR | 1728 | A | --- | 993 | N3  | MGT | 2001 | A | 3.53 |
| 44 | 182 | CE2 | TYR | 1728 | A | --- | 994 | C4  | MGT | 2001 | A | 3.61 |
| 45 | 183 | CZ  | TYR | 1728 | A | --- | 983 | N9  | MGT | 2001 | A | 3.71 |
| 46 | 183 | CZ  | TYR | 1728 | A | --- | 987 | C5  | MGT | 2001 | A | 3.64 |
| 47 | 183 | CZ  | TYR | 1728 | A | --- | 994 | C4  | MGT | 2001 | A | 3.49 |
| 48 | 184 | OH  | TYR | 1728 | A | --- | 983 | N9  | MGT | 2001 | A | 3.46 |
| 49 | 184 | OH  | TYR | 1728 | A | --- | 984 | C8  | MGT | 2001 | A | 3.48 |
| 50 | 184 | OH  | TYR | 1728 | A | --- | 985 | N7  | MGT | 2001 | A | 3.83 |
| 51 | 184 | OH  | TYR | 1728 | A | --- | 994 | C4  | MGT | 2001 | A | 3.76 |
| 52 | 633 | SE  | MSE | 1782 | A | --- | 980 | C2' | MGT | 2001 | A | 3.66 |
| 53 | 633 | SE  | MSE | 1782 | A | --- | 981 | O2' | MGT | 2001 | A | 3.7  |
| 54 | 634 | CE  | MSE | 1782 | A | --- | 991 | C2  | MGT | 2001 | A | 3.4  |
| 55 | 634 | CE  | MSE | 1782 | A | --- | 992 | N2  | MGT | 2001 | A | 3.31 |
| 56 | 634 | CE  | MSE | 1782 | A | --- | 993 | N3  | MGT | 2001 | A | 3.27 |

Number of hydrogen bonds: 5

Number of non-bonded contacts: 56
